# Supplementary material for: Coexistence of intrinsic piezoelectricity and ferromagnetism induced by small biaxial strain in septuple-atomic-layer VSi2P4
Source: Royal Society of Chemistry journal article supplement (doi:10.1039/d0cp05273f), 2020-01-01
Supplement: d0cp05273f1.pdf [file d0cp05273f1.pdf]

The POSCAR file of VSi2P4 monolayer

```
#####  
VSi2P4\monolayer  
1.0000000000000000  
 3.4862096632054005    0.0000000000000000    0.0000000000000000  
-1.7431048316027002    3.0191461312365422    0.0000000000000000  
 0.0000000000000000    0.0000000000000000    40.0000000000000000  
Si   P   V  
  2   4   1  
Direct  
0.6666666659999976  0.3333333320000023  0.9098310527864834  
0.6666666659999976  0.3333333320000023  0.0901689582135140  
0.6666666659999976  0.3333333320000023  0.9659740174019471  
0.6666666659999976  0.3333333320000023  0.0340259825980528  
0.0000000000000000  0.0000000000000000  0.1156145650938516  
0.0000000000000000  0.0000000000000000  0.8843853579061454  
0.3333333320000023  0.6666666650000010  0.0000000000000000  
#####
```

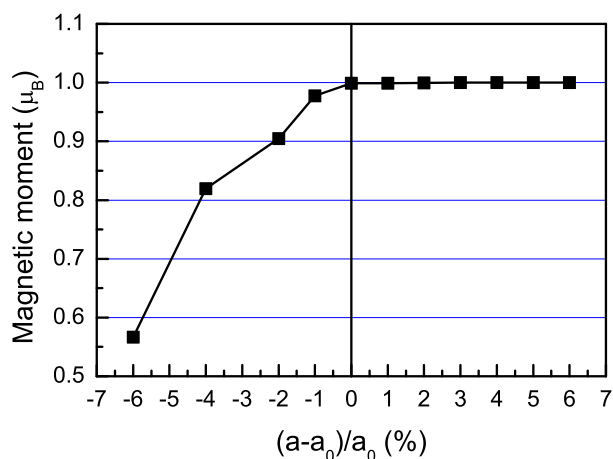

FIG. 1. The total magnetic moment as a function of strain .

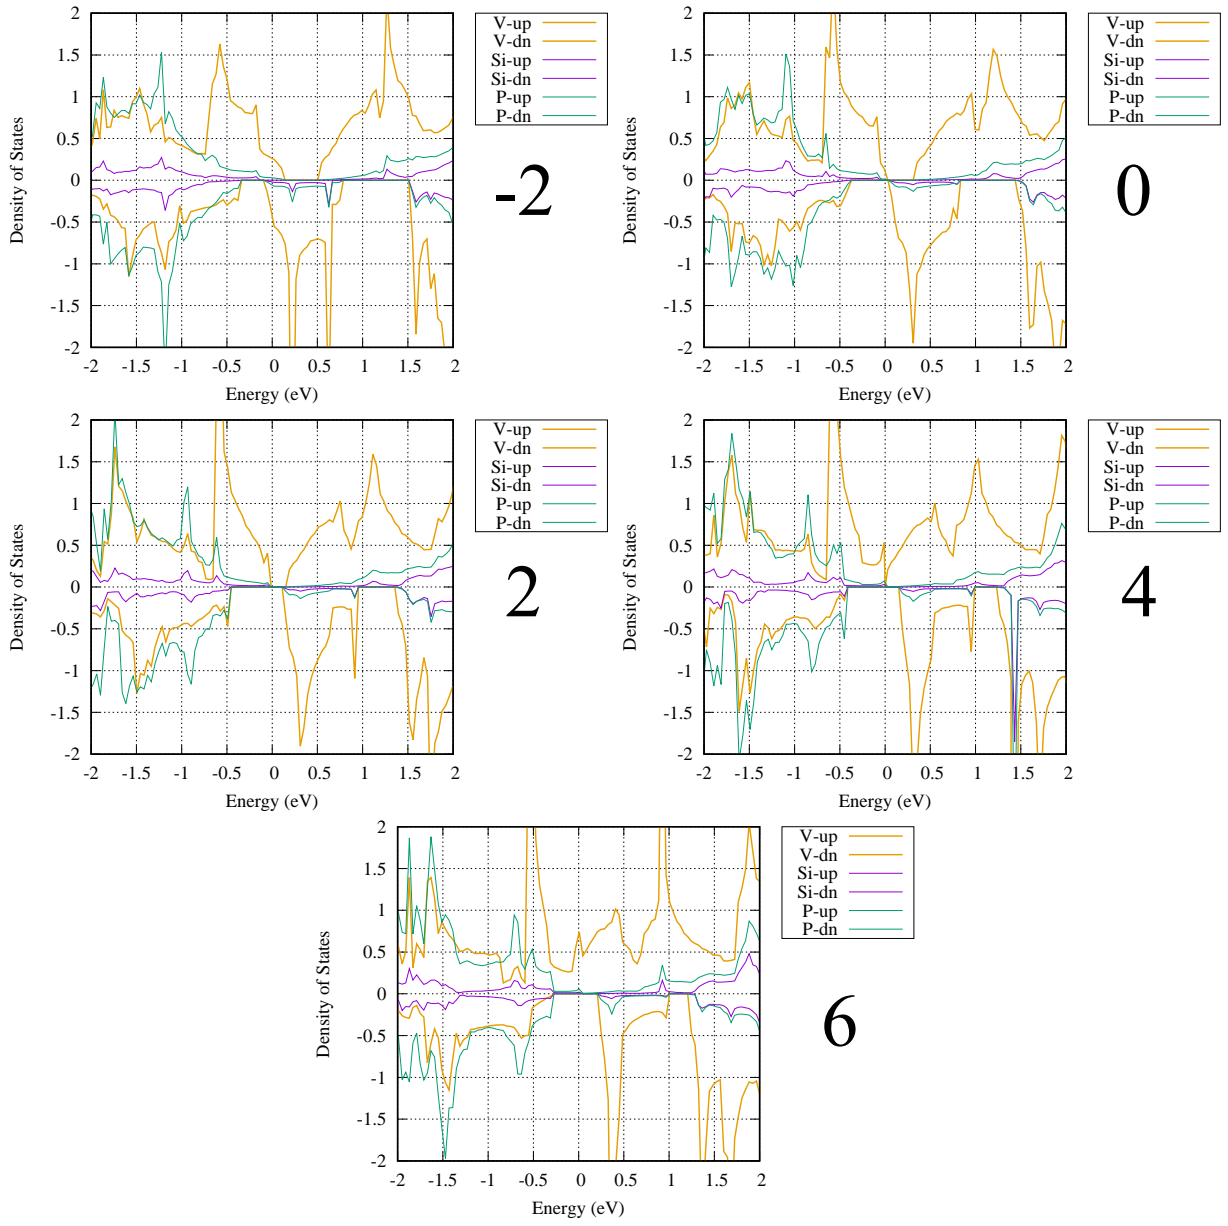

FIG. 2. (Color online) The atomic partial density of states of VSi<sub>2</sub>P<sub>4</sub> with strain (-2,0,2,4,6).
